# Supplementary material
Source: PubMed Central journal article supplement (PMC2872445)
Supplement: 1000266107_pnas.201000266SI.pdf [file 1000266107_pnas.201000266SI.pdf]

# Supporting Information

Campbell Grant et al. 10.1073/pnas.1000266107

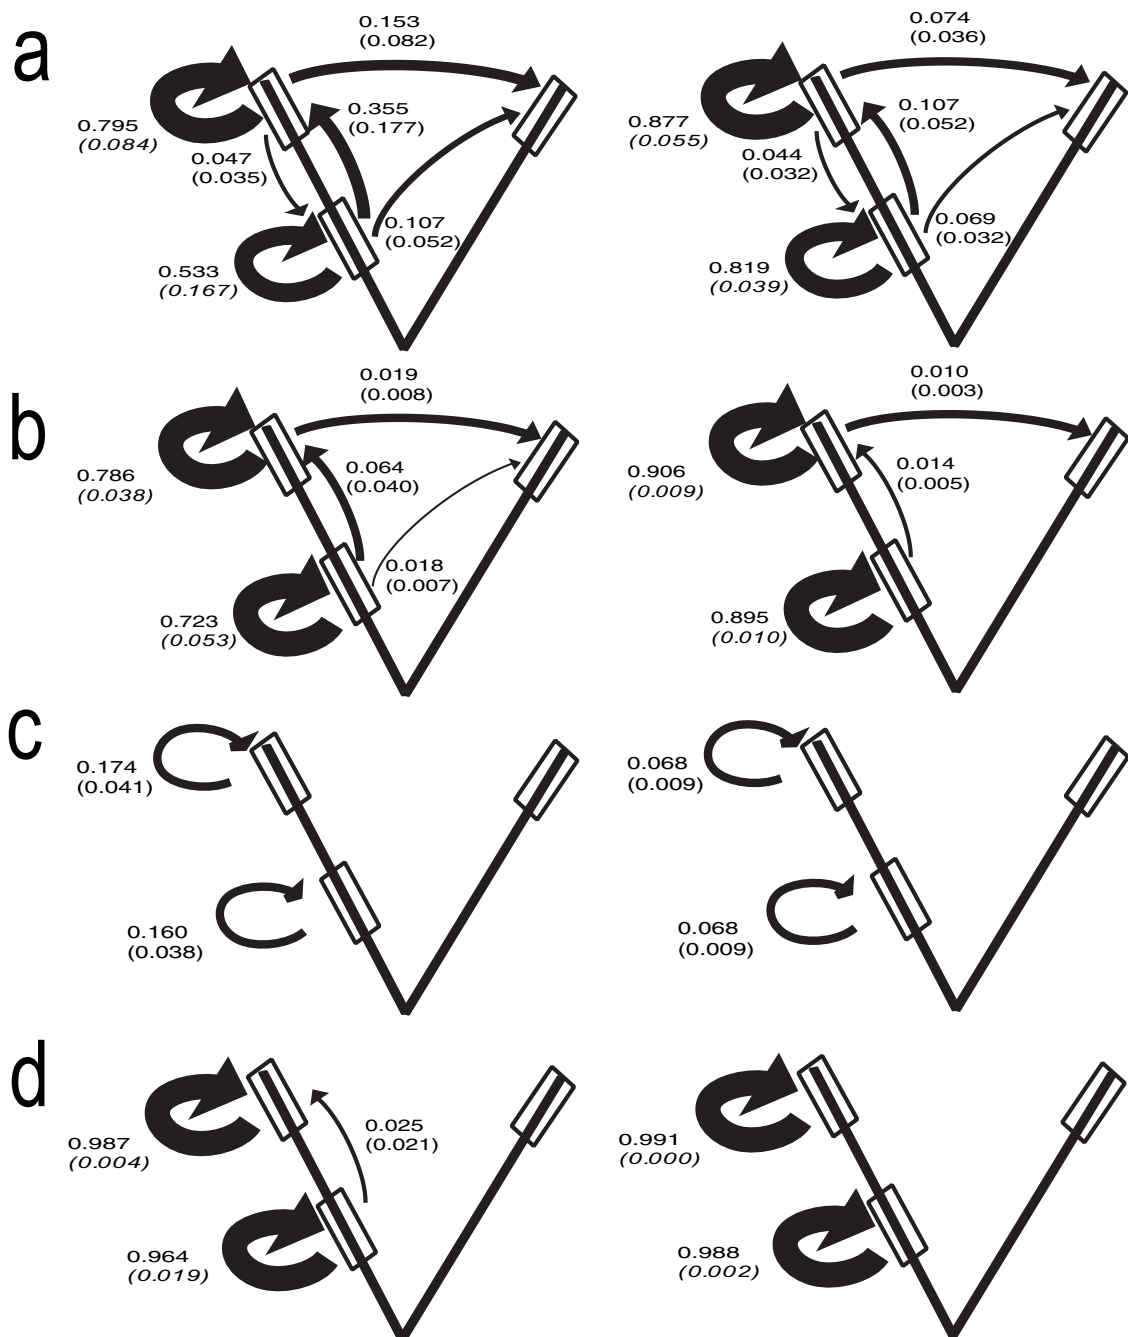

**Fig. S1.** Observed movement probabilities for *Desmognathus fuscus* (Left) and *D. monticola* (Right). Model-averaged monthly movement probabilities (and unconditional SEs) are shown. The letters refer to the type of age transition. (A) Larval to juvenile. (B) Remain juvenile. (C) Juvenile to adult. (D) Remain adult. Only movement probabilities  $\geq 0.01$  are shown for movements originating from the upper and lower reaches of the focal stream. The boxes represent the 40-m reaches that are separated by 350–500 m along the stream or overland (figure not drawn to scale; distances along the stream channel were equal to the overland distance in each stream network sampled).
